# Supplementary material for: Relevance of PNPLA3, TM6SF2, HSD17B13, and GCKR Variants to MASLD Severity in an Egyptian Population
Source: MDPI journal article supplement (doi:10.3390/genes15040455), 2024-04-04
Supplement: s1 [file s1]

A.

| GWAS Study   | Mapped Gene | Variant    | Location    | p-value             |
|--------------|-------------|------------|-------------|---------------------|
| GCST90275041 | PNPLA3      | rs738409   | 22:43928847 | $1 \times 10^{-66}$ |
| GCST90275041 | TM6SF2      | rs58542926 | 19:19268740 | $7 \times 10^{-53}$ |
| GCST90104598 | GCKR        | rs1260326  | 2:27508073  | $7 \times 10^{-14}$ |
| GCST010861   | HSD17B13    | rs9992651  | 4:87311358  | $3 \times 10^{-7}$  |

B.

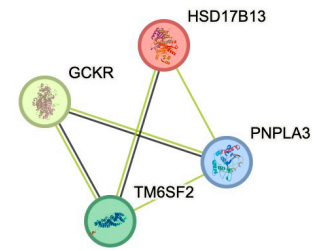

C.

| Protein  | SNP        | Variant Substitution | Substitution Score | Predicted Effect       |
|----------|------------|----------------------|--------------------|------------------------|
| PNPLA3   | rs738409   | I148M                | 0.02               | Deleterious            |
| TM6SF2   | rs58542926 | E167K<br>E167Ter     | 0.24               | Tolerated              |
| GCKR     | rs1260326  | L446P<br>L446R       | 0.14<br>0.31       | Tolerated<br>Tolerated |
| HSD17B13 | rs9992651  | Intron variant       | -                  | -                      |

Figure S1 A) Screening of Genome-wide association studies catalog for MASLD-related genetic variants identifying 4 genes with variants with p-value < 0.001. B) Protein-protein interaction network using STRING online tool showing the interaction of the four mapped genes. The required score was set to 0.7 (high confidence). C) Prediction of the impact of the selected genetic variants on protein function using the SIFT predictive tool. A score < 0.05 predicts the variation to be “deleterious”; whereas a score  $\geq 0.05$  would be “tolerated”.

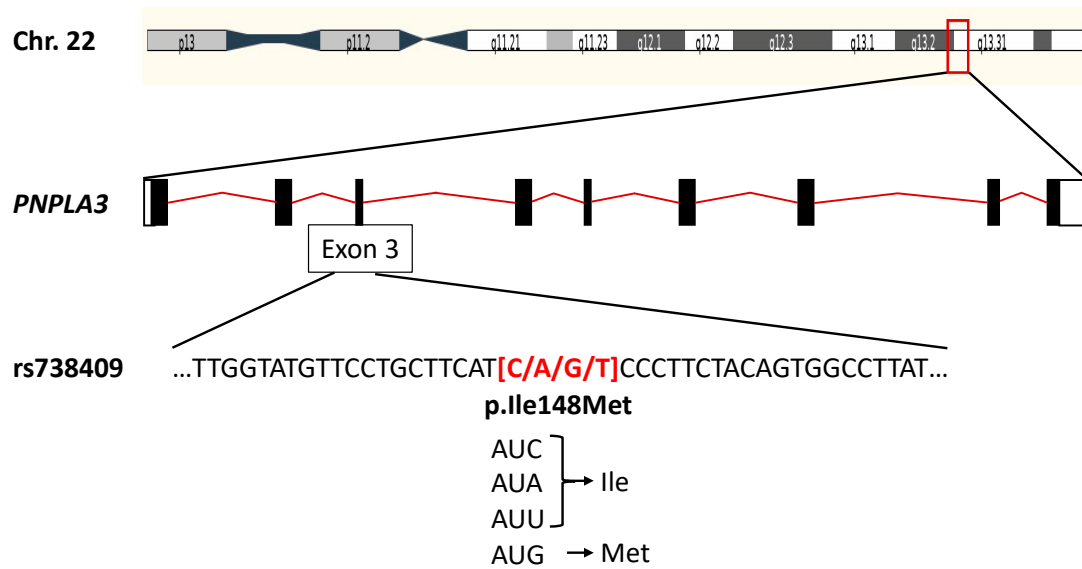

Figure S2 Location of *PNPLA3* gene on chromosome 22 and location of rs738409 within exon 3 with all possible alleles.



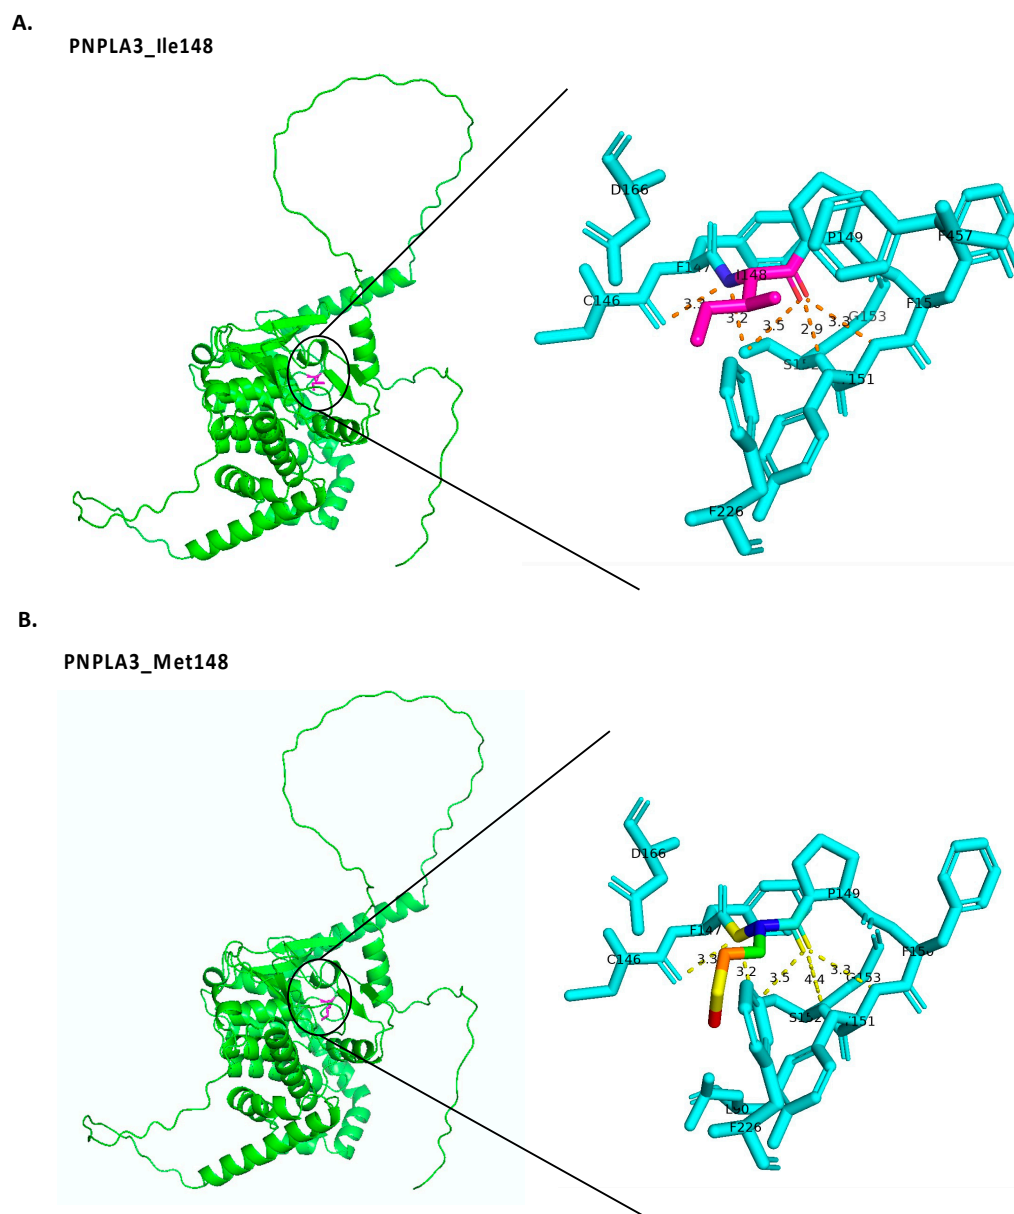

Figure S4 Comparison of the 3D structure of PNPLA3\_Ile148 (A) and PNPLA3\_Met148 (B) showing the main polar distances where Met148 had a larger distance compared to Ile148.

**Table S1: The proportions of participants with genotypes of *PNPLA3* rs738409 C>G, *TM6SF2* rs58542926 C>T, *HSD17B13* rs9992651 G>A, and *GCKR* rs1260326 T>C in MASLD cases and controls.**

|                                        | MASLD cases<br>(n = 205) |      | controls<br>(n = 187) |      | P-value               | FDR corrected p-value |
|----------------------------------------|--------------------------|------|-----------------------|------|-----------------------|-----------------------|
|                                        | No.                      | %    | No.                   | %    |                       |                       |
| PNPLA3 rs738409 C>G                    |                          |      |                       |      |                       |                       |
| Genotype                               |                          |      |                       |      | 0.004**               | 0.016*                |
| CC                                     | 100                      | 48.8 | 119                   | 63.6 |                       |                       |
| CG                                     | 83                       | 40.5 | 60                    | 32.1 |                       |                       |
| GG                                     | 22                       | 10.7 | 8                     | 4.3  |                       |                       |
| <sup>HW</sup> χ <sup>2</sup> (p-value) |                          |      | 0.900                 |      |                       |                       |
| Allele                                 | (n = 410)                |      | (n = 374)             |      | 0.001**               | -                     |
| C                                      | 283                      | 69   | 298                   | 79.7 |                       |                       |
| G                                      | 127                      | 31   | 76                    | 20.3 |                       |                       |
|                                        |                          |      |                       |      |                       |                       |
| TM6SF2 rs58542926 C>T                  |                          |      |                       |      |                       |                       |
| Genotype                               |                          |      |                       |      | <sup>FE</sup> P=0.940 | 0.940                 |
| CC                                     | 170                      | 82.9 | 157                   | 84.0 |                       |                       |
| CT                                     | 34                       | 16.6 | 30                    | 16.0 |                       |                       |
| TT                                     | 1                        | 0.5  | 0                     | 0.0  |                       |                       |
| <sup>HW</sup> FE (p-value)             |                          |      | 0.614                 |      |                       |                       |
| Allele                                 | (n = 410)                |      | (n = 374)             |      | 0.702                 | -                     |
| C                                      | 374                      | 91.2 | 344                   | 92.0 |                       |                       |
| T                                      | 36                       | 8.8  | 30                    | 8.0  |                       |                       |
|                                        |                          |      |                       |      |                       |                       |
| HSD17B13 rs9992651 G>A                 |                          |      |                       |      |                       |                       |
| Genotype                               |                          |      |                       |      | 0.279                 | 0.558                 |
| GG                                     | 150                      | 73.5 | 130                   | 71.4 |                       |                       |
| GA                                     | 46                       | 22.5 | 49                    | 26.9 |                       |                       |
| AA                                     | 8                        | 3.9  | 3                     | 1.6  |                       |                       |
| <sup>HW</sup> χ <sup>2</sup> (p-value) |                          |      | 0.504                 |      |                       |                       |
| Allele                                 | (n = 408)                |      | (n = 364)             |      | 0.973                 | -                     |
| G                                      | 346                      | 84.8 | 309                   | 84.9 |                       |                       |
| A                                      | 62                       | 15.2 | 55                    | 15.1 |                       |                       |
|                                        |                          |      |                       |      |                       |                       |
| GCKR rs1260326 T>C                     |                          |      |                       |      |                       |                       |
| Genotype                               |                          |      |                       |      | 0.824                 | 0.940                 |
| TT                                     | 70                       | 34.5 | 62                    | 34.1 |                       |                       |
| TC                                     | 102                      | 50.2 | 88                    | 48.4 |                       |                       |
| CC                                     | 31                       | 15.3 | 32                    | 17.6 |                       |                       |
| <sup>HW</sup> χ <sup>2</sup> (p-value) |                          |      | 0.936                 |      |                       |                       |
| Allele                                 | (n = 406)                |      | (n = 364)             |      | 0.701                 | -                     |
| T                                      | 242                      | 59.6 | 212                   | 58.2 |                       |                       |
| C                                      | 164                      | 40.4 | 152                   | 41.8 |                       |                       |
|                                        |                          |      |                       |      |                       |                       |

p-value estimated by Chi Square test for categorical datasets, \*<0.05; \*\* < 0.01.

<sup>FE</sup>P Fisher's Exact corrected p-value.

<sup>HW</sup> $\chi^2$ : Chi square for goodness of fit for Hardy-Weinberg equilibrium.

**Table S2: The proportions of participants with genotypes of *PNPLA3* rs738409 C>G, *TM6SF2* rs58542926 C>T, *HSD17B13* rs9992651 G>A, and *GCKR* rs1260326 T>C in MASLD cases with liver fibrosis, MASLD cases without liver fibrosis and controls.**

|                        | MASLD cases with liver fibrosis (n = 131) |      | MASLD cases without liver fibrosis (n=74) |       | Controls (n = 187) |      | P-value               | FDR corrected p-value |
|------------------------|-------------------------------------------|------|-------------------------------------------|-------|--------------------|------|-----------------------|-----------------------|
|                        | No.                                       | %    | No.                                       | %     | No.                | %    |                       |                       |
| PNPLA3 rs738409 C>G    |                                           |      |                                           |       |                    |      |                       |                       |
| Genotype               |                                           |      |                                           |       |                    |      | 0.003**               | 0.012*                |
| CC                     | 59                                        | 45   | 41                                        | 55.4  | 119                | 63.6 |                       |                       |
| CG                     | 54                                        | 41.2 | 29                                        | 39.2  | 60                 | 32.1 |                       |                       |
| GG                     | 18                                        | 13.7 | 4                                         | 5.4   | 8                  | 4.3  |                       |                       |
| Allele                 | (n = 262)                                 |      | (n=148)                                   |       | (n=374)            |      | < 0.001 ***           | -                     |
| C                      | 172                                       | 65.6 | 111                                       | 75    | 298                | 79.7 |                       |                       |
| G                      | 90                                        | 34.4 | 37                                        | 25    | 76                 | 20.3 |                       |                       |
| TM6SF2 rs58542926 C>T  |                                           |      |                                           |       |                    |      |                       |                       |
| Genotype               |                                           |      |                                           |       |                    |      | <sup>FE</sup> P=0.526 | 0.526                 |
| CC                     | 110                                       | 84   | 60                                        | 81.1  | 157                | 84   |                       |                       |
| CT                     | 21                                        | 16   | 13                                        | 17.6  | 30                 | 16   |                       |                       |
| TT                     | 0                                         | 0    | 1                                         | 1.4   | 0                  | 0    |                       |                       |
| Allele                 | (n = 262)                                 |      | (n=148)                                   |       | (n=374)            |      | 0.706                 | -                     |
| C                      | 241                                       | 92.0 | 133                                       | 89.9  | 344                | 92   |                       |                       |
| T                      | 21                                        | 8.0  | 15                                        | 10.1  | 30                 | 8    |                       |                       |
| HSD17B13 rs9992651 G>A |                                           |      |                                           |       |                    |      |                       |                       |
| Genotype               |                                           |      |                                           |       |                    |      | <sup>FE</sup> P=0.350 | 0.526                 |
| GG                     | 100                                       | 76.3 | 50                                        | 68..5 | 130                | 71.4 |                       |                       |
| GA                     | 26                                        | 19.8 | 20                                        | 27.4  | 49                 | 26.9 |                       |                       |
| AA                     | 5                                         | 3.8  | 3                                         | 4.1   | 3                  | 1.6  |                       |                       |
| Allele                 | (n = 262)                                 |      | (n=146)                                   |       | (n=364)            |      | 0.547                 | -                     |
| G                      | 226                                       | 86.3 | 120                                       | 82.2  | 309                | 84.9 |                       |                       |
| A                      | 36                                        | 13.7 | 26                                        | 17.8  | 55                 | 15.1 |                       |                       |
| GCKR rs1260326 T>C     |                                           |      |                                           |       |                    |      |                       |                       |
| Genotype               |                                           |      |                                           |       |                    |      | 0.504                 | 0.526                 |
| TT                     | 49                                        | 34.5 | 21                                        | 28.4  | 62                 | 34.1 |                       |                       |
| TC                     | 59                                        | 50.2 | 43                                        | 58.1  | 88                 | 48.4 |                       |                       |
| CC                     | 21                                        | 15.3 | 10                                        | 13.5  | 32                 | 17.6 |                       |                       |
| Allele                 | (n = 258)                                 |      | (n=148)                                   |       | (n=364)            |      | 0.740                 | -                     |
| T                      | 157                                       | 60.9 | 85                                        | 57.4  | 212                | 58.2 |                       |                       |
| C                      | 101                                       | 39.1 | 63                                        | 42.6  | 152                | 41.8 |                       |                       |

p-value estimated by Chi Square test for categorical datasets, \*\* < 0.01; \*\*\* < 0.001.

<sup>FE</sup>P Fisher's Exact corrected p-value.

**Table S3. Association of genotypes of *PNPLA3* rs738409 C>G, *TM6SF2* rs58542926 C>T, *HSD17B13* rs9992651 G>A, and *GCKR* rs1260326 T>C in MASLD cases with liver fibrosis, MASLD cases without liver fibrosis, and controls (After adjusting for the risk factors (age, sex, BMI, WC, HDL, TG, diabetes mellitus, and hypertension)).**

|                               | Control (Ref.) (n = 187)<br>versus MASLD cases with liver<br>fibrosis (n = 131) |                         | Control (Ref.) (n = 187)<br>versus MASLD cases without<br>liver fibrosis (n = 74) |                      |
|-------------------------------|---------------------------------------------------------------------------------|-------------------------|-----------------------------------------------------------------------------------|----------------------|
|                               | p-value <sup>1</sup>                                                            | OR (95%C.I)             | p-value <sup>2</sup>                                                              | OR (95%C.I)          |
| <i>PNPLA3</i> rs738409 C>G    |                                                                                 |                         |                                                                                   |                      |
| Genotype                      |                                                                                 |                         |                                                                                   |                      |
| CC(Ref.) (n=219)              |                                                                                 | 1.000                   |                                                                                   | 1.000                |
| CG (n=143)                    | 0.783                                                                           | 1.234(0.277 -5.486)     | 0.632                                                                             | 0.715 (0.181-2.828)  |
| GG (n=30)                     | 0.477                                                                           | 9.348 (0.020 -4454.064) | 0.043*                                                                            | 9.085(1.073-76.885)  |
| <i>TM6SF2</i> rs58542926 C>T  |                                                                                 |                         |                                                                                   |                      |
| Genotype                      |                                                                                 |                         |                                                                                   |                      |
| CC(Ref.) (n=327)              |                                                                                 | 1.000                   |                                                                                   | 1.000                |
| CT (n=64)                     | 0.242                                                                           | 3.434 (0.435-27.107)    | 0.594                                                                             | 0.647 (0.131 -3.201) |
| TT (n=1)                      | 0.995                                                                           | 0.994(0.182-5.429)      | -                                                                                 | -                    |
| <i>HSD17B13</i> rs9992651 G>A |                                                                                 |                         |                                                                                   |                      |
| Genotype                      |                                                                                 |                         |                                                                                   |                      |
| GG(Ref.) (n=280)              |                                                                                 | 1.000                   |                                                                                   | 1.000                |
| GA (n=95)                     | 0.219                                                                           | 3.439 (0.480-24.641)    | 0.940                                                                             | 0.941 (0.188-4.705)  |
| AA (n=11)                     | 1.000                                                                           | -                       | 0.455                                                                             | 1.759 (0.400-7.739)  |
| <i>GCKR</i> rs1260326 T>C     |                                                                                 |                         |                                                                                   |                      |
| Genotype                      |                                                                                 |                         |                                                                                   |                      |
| TT(Ref.) (n=132)              |                                                                                 | 1.000                   |                                                                                   | 1.000                |
| TC (n=190)                    | 0.436                                                                           | 0.489(0.081-2.962)      | 0.922                                                                             | 0.925 (0.191-4.474)  |
| CC(n=63)                      | 0.414                                                                           | 0.275(0.012-6.100)      | 0.353                                                                             | 2.728 (0.328-22.689) |

Ref., reference group; OR, odds ratio; C.I., confidence interval; p-value<sup>1</sup> and p-value<sup>2</sup> estimated by logistic regression analysis, \*<0.05; \*\* < 0.01.

**Table S4:** The proportions of participants with genotypes of *PNPLA3* rs738409 C>G, *TM6SF2* rs58542926 C>T, *HSD17B13* rs9992651 G>A, and *GCKR* rs1260326 T>C in subjects with different severities of liver fibrosis.

| PNPLA3 rs738409 C>G    |            |            |            |                         |                              |
|------------------------|------------|------------|------------|-------------------------|------------------------------|
|                        | CC<br>n(%) | CG<br>n(%) | GG<br>n(%) | P value                 | FDR<br>corrected p-<br>value |
| F0-1                   | 160(73)    | 89(62.2)   | 12(40)     | <sup>FE</sup> P=0.003** | 0.012*                       |
| F2                     | 43(19.6)   | 36(25.2)   | 11(36.7)   |                         |                              |
| F3                     | 14(6.4)    | 12(8.4)    | 5(16.7)    |                         |                              |
| F4                     | 2(1)       | 6(4.2)     | 2(6.7)     |                         |                              |
| TM6SF2 rs58542926 C>T  |            |            |            |                         |                              |
|                        | CC<br>n(%) | CT<br>n(%) | TT<br>n(%) | P value                 | FDR<br>corrected p-<br>value |
| F0-1                   | 217(66.4)  | 43(34.1)   | 1(100)     | <sup>FE</sup> P=0.943   | 0.943                        |
| F2                     | 75(22.9)   | 15(12.9)   | 0(0)       |                         |                              |
| F3                     | 27(8.3)    | 4(6.4)     | 0(0)       |                         |                              |
| F4                     | 8(2.4)     | 2(3.1)     | 0(0)       |                         |                              |
| HSD17B13 rs9992651 G>A |            |            |            |                         |                              |
|                        | GG<br>n(%) | AG<br>n(%) | AA<br>n(%) | P value                 | FDR<br>corrected p-<br>value |
| F0-1                   | 180(64.3)  | 69(72.6)   | 6(54.5)    | <sup>FE</sup> P=0.260   | 0.365                        |
| F2                     | 70(25)     | 16(16.8)   | 4(36.4)    |                         |                              |
| F3                     | 24(8.6)    | 7(7.4)     | 0(0)       |                         |                              |
| F4                     | 6(2.1)     | 3(3.2)     | 1(9.1)     |                         |                              |
| GCKR rs1260326 T>C     |            |            |            |                         |                              |
|                        | TT<br>n(%) | TC<br>n(%) | CC<br>n(%) | P value                 | FDR<br>corrected p-<br>value |
| F0-1                   | 83(62.9)   | 131(68.9)  | 42(66.7)   | <sup>FE</sup> P=0.274   | 0.365                        |
| F2                     | 35(26.5)   | 44(23.2)   | 11(17.5)   |                         |                              |
| F3                     | 9(6.8)     | 13(6.8)    | 7(11.1)    |                         |                              |
| F4                     | 5(3.8)     | 2(1.1)     | 3(4.8)     |                         |                              |

<sup>FE</sup>P Fisher's Exact corrected p-value, \*<0.05; \*\* < 0.01.



**Table S5. Association of genotypes of *PNPLA3* rs738409 C>G, *TM6SF2* rs58542926 C>T, *HSD17B13* rs9992651 G>A, and *GCKR* rs1260326 T>C with different severity of liver fibrosis in MASLD by logistic regression analysis (After adjusting for the risk factors (age, sex, BMI, WC, HDL, TG, diabetes mellitus, and hypertension)).**

|                                                         | F0-1 (Ref.) (n = 261)<br>VS F2 (n = 90) |                                                     | F0-1 (Ref.) (n = 261)<br>VS F3 (n = 31) |                                                     | F0-1 (Ref.) (n = 261)<br>VS F4 (n = 10) |                                                           |
|---------------------------------------------------------|-----------------------------------------|-----------------------------------------------------|-----------------------------------------|-----------------------------------------------------|-----------------------------------------|-----------------------------------------------------------|
|                                                         | p-value <sub>1</sub>                    | OR (95%C.I)                                         | p-value <sub>2</sub>                    | OR (95%C.I)                                         | p-value <sub>3</sub>                    | OR (95%C.I)                                               |
| <i>PNPLA3</i> rs738409 C>G                              |                                         |                                                     |                                         |                                                     |                                         |                                                           |
| Genotype<br>CC(Ref.) (n=219)<br>CG (n=143)<br>GG (n=30) | 0.585<br>0.008**                        | 1.000<br>1.098(0.785-1.537)<br>5.482 (1.572-19.112) | 0.606<br>0.017<br>*                     | 1.000<br>1.135(0.701-1.840)<br>9.641 (1.493-62.233) | 0.299<br>0.034*                         | 1.000<br>1.666 (0.635 -4.372)<br>107.296 (1.411-8157.152) |
| <i>TM6SF2</i> rs58542926 C>T                            |                                         |                                                     |                                         |                                                     |                                         |                                                           |
| Genotype<br>CC(Ref.) (n=327)<br>CT (n=64)<br>TT (n=1)   | 0.734<br>1.000                          | 1.000<br>1.152(0.510-2.604)<br>-                    | 0.245<br>1.000                          | 1.000<br>0.455(0.121-1.717)<br>-                    | 0.982<br>-                              | 1.000<br>0.976 (0.121-7.891)<br>-                         |
| <i>HSD17B13</i> rs9992651 G>A                           |                                         |                                                     |                                         |                                                     |                                         |                                                           |
| Genotype<br>GG(Ref.) (n=280)<br>GA (n=95)<br>AA (n=11)  | 0.012*<br>0.949                         | 1.000<br>0.341(0.148-0.787)<br>1.030(0.414-2.561)   | 0.190<br>0.999                          | 1.000<br>0.473(0.155-1.448)<br>-                    | 0.762<br>0.502                          | 1.000<br>0.733 (0.098-5.471)<br>1.933 (0.282-13.222)      |
| <i>GCKR</i> rs1260326 T>C                               |                                         |                                                     |                                         |                                                     |                                         |                                                           |
| Genotype<br>TT(Ref.) (n=132)<br>TC (n=190)<br>CC(n=63)  | 0.206<br>0.922                          | 1.000<br>0.633(0.312-1.286)<br>0.946(0.311-2.876)   | 0.530<br>0.483                          | 1.000<br>0.709(0.242-2.075)<br>1.660(0.404-6.825)   | 0.168<br>0.839                          | 1.000<br>0.262(0.039-1.757)<br>0.766 (0.059-9.968)        |

Ref., reference group; OR, odds ratio; C.I., confidence interval; p-value<sup>1</sup>, p-value<sup>2</sup>, and p-value<sup>3</sup> estimated by logistic regression analysis, \*<0.05; \*\* < 0.01.

**Table S6: The proportions of participants with genotypes of *PNPLA3* rs738409 C>G, *TM6SF2* rs58542926 C>T, *HSD17B13* rs9992651 G>A, and *GCKR* rs1260326 T>C in subjects with different severities of hepatic steatosis.**

| PNPLA3 rs738409 C>G    |            |            |            |                       |                           |
|------------------------|------------|------------|------------|-----------------------|---------------------------|
|                        | CC<br>n(%) | CG<br>n(%) | GG<br>n(%) | P value               | FDR corrected p-<br>value |
| S0-1                   | 141(64.4)  | 70(49)     | 9(30)      | 0.001**               | 0.004**                   |
| S2                     | 38(17.4)   | 32(22.4)   | 12(40)     |                       |                           |
| S3                     | 40(18.3)   | 41(28.7)   | 9(30)      |                       |                           |
| TM6SF2 rs58542926 C>T  |            |            |            |                       |                           |
|                        | CC<br>n(%) | CT<br>n(%) | TT<br>n(%) | P value               | FDR corrected p-<br>value |
| S0-1                   | 183(56)    | 37(57.8)   | 0          | <sup>FE</sup> P=0.465 | 0.465                     |
| S2                     | 67(20.5)   | 15(23.4)   | 0          |                       |                           |
| S3                     | 77(23.5)   | 12(18.8)   | 1(100)     |                       |                           |
| HSD17B13 rs9992651 G>A |            |            |            |                       |                           |
|                        | GG<br>n(%) | AG<br>n(%) | AA<br>n(%) | P value               | FDR corrected p-<br>value |
| S0-1                   | 152(54.3)  | 57(60)     | 5(45.5)    | <sup>FE</sup> P=0.419 | 0.465                     |
| S2                     | 65(23.2)   | 14(14.7)   | 3(27.3)    |                       |                           |
| S3                     | 63(22.5)   | 24(25.3)   | 3(27.3)    |                       |                           |
| GCKR rs1260326 T>C     |            |            |            |                       |                           |
|                        | TT<br>n(%) | TC<br>n(%) | CC<br>n(%) | P value               | FDR corrected p-<br>value |
| S0-1                   | 68(51.5)   | 115(60.5)  | 32(50.8)   | 0.422                 | 0.465                     |
| S2                     | 33(25)     | 34(17.9)   | 15(23.8)   |                       |                           |
| S3                     | 31(23.5)   | 41(21.6)   | 16(25.4)   |                       |                           |

p-value estimated by Chi Square test for categorical datasets, \*\* < 0.01.

<sup>FE</sup>P Fisher's Exact corrected p-value.

**Table S7. Association of genotypes of *PNPLA3* rs738409 C>G, *TM6SF2* rs58542926 C>T, *HSD17B13* rs9992651 G>A, and *GCKR* rs1260326 T>C with different severity of hepatic steatosis in MASLD by logistic regression analysis.**

|                                 | S0-1 (Ref.) (n = 220)<br>VS<br>S2 (n = 82) |                     | S0-1 (Ref.) (n = 220)<br>VS<br>S3 (n = 90) |                    |
|---------------------------------|--------------------------------------------|---------------------|--------------------------------------------|--------------------|
|                                 | p-value <sup>1</sup>                       | OR (95%C.I)         | p-value <sup>2</sup>                       | OR (95%C.I)        |
| <i>PNPLA3</i> rs738409 C>G      |                                            |                     |                                            |                    |
| Genotype<br>CC(Ref.)<br>(n=219) | 0.060                                      | 1.000               | 0.006**                                    | 1.000              |
| CG (n=143)                      | 0.001**                                    | 1.696(0.978-2.942)  | 0.012*                                     | 2.065(1.226-3.478) |
| GG (n=30)                       |                                            | 4.947(1.941-12.609) |                                            | 3.525(1.312-9.471) |
| <i>TM6SF2</i> rs58542926 C>T    |                                            |                     |                                            |                    |
| Genotype<br>CC(Ref.)<br>(n=327) | 0.763                                      | 1.000               | 0.468                                      | 1.000              |
| CT (n=64)                       | -                                          | 1.107(0.571-2.147)  | -                                          | 0.771(0.381-1.558) |
| TT (n=1)                        |                                            | -                   |                                            | -                  |
| <i>HSD17B13</i> rs9992651 G>A   |                                            |                     |                                            |                    |
| Genotype<br>GG(Ref.)<br>(n=280) | 0.096                                      | 1.000               | 0.956                                      | 1.000              |
| GA (n=95)                       | 0.649                                      | 0.574(0.299-1.103)  | 0.620                                      | 1.016(0.580-1.779) |
| AA (n=11)                       |                                            | 1.403(0.326-6.045)  |                                            | 1.448(0.336-6.241) |
| <i>GCKR</i> rs1260326 T>C       |                                            |                     |                                            |                    |
| Genotype<br>TT(Ref.) (n=132)    |                                            | 1.000               |                                            | 1.000              |
| TC (n=190)                      | 0.086                                      | 0.609(0.346-1.072)  | 0.385                                      | 0.782(0.449-1.362) |
| CC(n=63)                        | 0.927                                      | 0.966(0.460-2.026)  | 0.805                                      | 1.097(0.526-2.288) |

Ref., reference group; OR, odds ratio; C.I., confidence interval; p-value<sup>1</sup>, and p-value<sup>2</sup> estimated by logistic regression analysis, \*<0.05; \*\* < 0.01.

**Table S8. A) Clinical characteristics of *PNPLA3* rs738409 C>G and *TM6SF2* rs58542926 C>T carriers and non-carriers in the study population.**

| Phenotype                                             | <i>PNPLA3</i> rs738409 C>G |                | P-value | FDR corrected p-value | <i>TM6SF2</i> rs58542926 C>T |                | P-value | FDR corrected p-value |
|-------------------------------------------------------|----------------------------|----------------|---------|-----------------------|------------------------------|----------------|---------|-----------------------|
|                                                       | Carriers                   | Non-carriers   |         |                       | Carriers                     | Non-carriers   |         |                       |
| Diabetes (n)<br>(Diabetic/<br>Prediabetic/<br>Normal) | (40/6/127)                 | (38/8/173)     | 0.364   | 0.54                  | (18-2-45)                    | (60/12/255)    | 0.226   | 0.565                 |
| Hypertension (n)<br>(Hypertensive/<br>Normal)         | (64/109)                   | (61/158)       | 0.054   | 0.162                 | (18/47)                      | (107/220)      | 0.427   | 0.864                 |
| FBG(mg/dl)                                            | 97.23±26.901               | 96.56±28.982   | 0.935   | 0.939                 | 105.68±36.151                | 95.10±25.854   | 0.017*  | 0.128                 |
| PPBS(mg/dl)                                           | 115.72±33.881              | 112.73±26.457  | 0.689   | 0.939                 | 115.98±25.591                | 113.66±30.772  | 0.157   | 0.565                 |
| SBP(mmHg)                                             | 119.96±17.263              | 116.75±12.854  | 0.029*  | 0.145                 | 118.15±14.481                | 118.17±15.152  | 0.888   | 0.982                 |
| DBP(mmHg)                                             | 81.79±10.159               | 79.95±11.717   | 0.015*  | 0.113                 | 80.97±12.111                 | 80.72±10.885   | 0.922   | 0.982                 |
| WC(cm)                                                | 106.29±13.680              | 106.28±13.268  | 0.939   | 0.939                 | 103.0±11.622                 | 106.94±13.688  | 0.013*  | 0.128                 |
| BMI (kg/m <sup>2</sup> )                              | 30.13±5.709                | 30.27±6.388    | 0.821   | 0.939                 | 29.52±5.217                  | 30.34±6.248    | 0.461   | 0.864                 |
| ALT(U/L)                                              | 30.782±27.718              | 22.333±17.377  | 0.002** | 0.030*                | 27.631±24.177                | 25.750±22.652  | 0.607   | 0.911                 |
| AST (U/L)                                             | 28.961±20.710              | 24.197±11.292  | 0.052   | 0.162                 | 26.508±11.899                | 26.258±17.044  | 0.200   | 0.565                 |
| GGT (U/L)                                             | 31.473±24.184              | 29.959±32.840  | 0.066   | 0.165                 | 27.323±15.735                | 31.284±31.292  | 0.774   | 0.968                 |
| TC(mg/dl)                                             | 180.069±42.223             | 187.068±44.515 | 0.114   | 0.244                 | 183.40±38.546                | 184.095±44.593 | 0.982   | 0.982                 |
| LDL-C(mg/dl)                                          | 119.15±36.787              | 123.805±36.619 | 0.323   | 0.538                 | 123.646±32.870               | 121.374±37.472 | 0.594   | 0.911                 |
| HDL-C(mg/dl)                                          | 38.416±11.055              | 38.206±11.605  | 0.907   | 0.939                 | 38.138±10.504                | 38.33±11.528   | 0.749   | 0.968                 |
| TG(mg/dl)                                             | 125.457±62.10              | 124.032±76.150 | 0.256   | 0.480                 | 112.338±61.119               | 127.110±71.718 | 0.062   | 0.310                 |

**B) Clinical characteristics of *HSD17B13* rs9992651 A and *GCKR* rs1260326 C carriers and non-carriers in the study population.**

| Phenotype                                             | <i>HSD17B13</i> rs9992651 G>A |                | P-value | FDR corrected p-value | <i>GCKR</i> rs1260326 T>C |                | P-value | FDR corrected p-value |
|-------------------------------------------------------|-------------------------------|----------------|---------|-----------------------|---------------------------|----------------|---------|-----------------------|
|                                                       | Carriers                      | Non-carriers   |         |                       | Carriers                  | Non-carriers   |         |                       |
| Diabetes (n)<br>(Diabetic/<br>Prediabetic/<br>Normal) | (21/5/80)                     | (56/9/215)     | 0.780   | 0.947                 | (54-6-193)                | (23-8-101)     | 0.141   | 0.423                 |
| Hypertension (n)<br>(Hypertensive/<br>Normal)         | (35/71)                       | (90/190)       | 0.870   | 0.947                 | (78-175)                  | (45-87)        | 0.515   | 0.858                 |
| FBG(mg/dl)                                            | 98.43±32.636                  | 95.71±24.285   | 0.771   | 0.947                 | 97.57±30.778              | 95.67±22.759   | 0.659   | 0.913                 |
| PPBS(mg/dl)                                           | 115.16±29.238                 | 113.74±30.439  | 0.350   | 0.947                 | 114.62±30.598             | 113.40±29.170  | 0.817   | 0.913                 |
| SBP(mmHg)                                             | 118.18±14.035                 | 118.11±15.556  | 0.884   | 0.947                 | 117.32±13.523             | 119.58±17.720  | 0.063   | 0.236                 |
| DBP(mmHg)                                             | 81.96±13.653                  | 80.32±10.059   | 0.584   | 0.947                 | 80.12±11.444              | 81.88±10.472   | 0.043*  | 0.236                 |
| WC(cm)                                                | 107.01±13.264                 | 106.21±13.538  | 0.749   | 0.947                 | 106.38±13.820             | 106.08±12.498  | 0.902   | 0.913                 |
| BMI (kg/m <sup>2</sup> )                              | 30.51±5.956                   | 30.18±6.149    | 0.524   | 0.947                 | 30.21±6.308               | 30.17±5.559    | 0.913   | 0.913                 |
| ALT(U/L)                                              | 25.160±20.459                 | 26.676±23.919  | 0.850   | 0.947                 | 24.561±21.314             | 29.229±25.494  | 0.056   | 0.236                 |
| AST (U/L)                                             | 25.322±12.571                 | 26.672±17.601  | 0.947   | 0.947                 | 24.625±13.320             | 29.434±20.499  | 0.014*  | 0.210                 |
| GGT (U/L)                                             | 27.858±17.036                 | 31.799±32.985  | 0.879   | 0.947                 | 29.735±30.705             | 32.286±27.024  | 0.269   | 0.504                 |
| TC(mg/dl)                                             | 187.679±41.059                | 182.461±44.862 | 0.246   | 0.947                 | 182.237±43.759            | 187.735±43.238 | 0.243   | 0.504                 |
| LDL-C(mg/dl)                                          | 124.465±33.936                | 120.621±38.038 | 0.323   | 0.947                 | 121.249±37.531            | 123.222±34.920 | 0.750   | 0.913                 |
| HDL-C(mg/dl)                                          | 38.226±11.583                 | 38.190±11.255  | 0.852   | 0.947                 | 38.379±11.097             | 38.198±11.499  | 0.875   | 0.913                 |
| TG(mg/dl)                                             | 133.104±85.935                | 121.921±63.63  | 0.495   | 0.947                 | 119.664±60.259            | 133.303±84.558 | 0.264   | 0.504                 |

Values are presented as numbers (n) or mean ± standard deviation.

BMI, body mass index; WC, waist circumference; SBP, systolic blood pressure; DBP, diastolic blood pressure; ALT, alanine aminotransferase; AST, aspartate transaminase; GGT, gamma-glutamyl transpeptidase; FBG, fasting blood glucose; PPBS, post-prandial blood sugar; TC, total cholesterol; TG, triacylglyceride; LDL-C, low-density lipoprotein cholesterol; HDL-C, high-density lipoprotein cholesterol. P-value estimated by the Chi-Square test or Mann-Whitney test for categorical or non-normally distributed continuous, respectively, \* $<0.05$ ; \*\*  $<0.01$ .

**Table S9. A power calculation of sample size to evaluate the effect of genetic variations on MASLD.**

| MASLD cases                   | controls     | Test family | Total sample size | Effect size | $\alpha$ error probability | Achieved power |
|-------------------------------|--------------|-------------|-------------------|-------------|----------------------------|----------------|
| <i>PNPLA3</i> rs738409 C>G    |              |             |                   |             |                            |                |
| n=205                         | n=187        | $X^2$       | 392               | 0.3         | 0.05                       | 0.9988964      |
| <i>TM6SF2</i> rs58542926 C>T  |              |             |                   |             |                            |                |
| n=205                         | <i>n=187</i> | $X^2$       | 392               | 0.3         | 0.05                       | 0.9988964      |
| <i>HSD17B13</i> rs9992651 G>A |              |             |                   |             |                            |                |
| n=204                         | <i>n=182</i> | $X^2$       | 386               | 0.3         | 0.05                       | 0.9987241      |
| <i>GCKR</i> rs1260326 T>C     |              |             |                   |             |                            |                |
| n=203                         | <i>n=182</i> | $X^2$       | 385               | 0.3         | 0.05                       | 0.9986930      |

$X^2$  Chi Square test
